# Supplementary material for: Community Education for a Dignified Last Phase of Life for Migrants: A Community Engagement, Mixed Methods Study among Moroccan, Surinamese and Turkish Migrants
Source: MDPI journal article supplement (doi:10.3390/ijerph17217797), 2020-10-24
Supplement: s1 [file s1]

## Codetree interviews individual participants

| Theme                                 | Codes                                                                                                                                                                                                   | Subcodes                                                                                                                                                                                                                  |
|---------------------------------------|---------------------------------------------------------------------------------------------------------------------------------------------------------------------------------------------------------|---------------------------------------------------------------------------------------------------------------------------------------------------------------------------------------------------------------------------|
| Motivation to participate             | Obtaining knowledge<br>It is an important subject<br>Coming together with the group                                                                                                                     |                                                                                                                                                                                                                           |
| Experience of the meeting             | Appropriateness<br><br>Responsiveness                                                                                                                                                                   | Confronting subject<br>Good to have more awareness<br>Being able to discuss all possibilities<br><br>Knowledge / information about palliative care (services) was needed<br><br>Relevant subjects discussed (family care) |
| Importance of the educational meeting | Doing this in a group (was beneficial)<br>Bring in own knowledge<br><br>Lack of information by care professionals<br>Arranging a dignified/good last phase of life<br>Knowledge need                    |                                                                                                                                                                                                                           |
| Own wishes and needs                  | Before / No wishes because of unfamiliarity<br>Before / Respect for the dead<br>Before / Practicing religion<br>Before / Being cared for as long as possible<br>Before / Not wanting to become a burden |                                                                                                                                                                                                                           |

Before / Giving value to life  
 Before / No pain or extension of suffering  
 Before / Not experiencing the last phase  
 Before / Wishes regarding after dying: cremation  
 or funeral  
 Before / Utilize external care  
 Before / Deciding myself about the end of life  
 Before / Weather wants to know about  
 diagnosis/prognosis  
 After / Practicin religion  
 After / Not wanting to become a burden  
 After / Weather wants to know about diagnosis /  
 prognosis  
 After / Wishes regarding after dying: cremation or  
 funeral  
 After / Affection during the last days  
 After / Wishes regarding medication and medical  
 choices  
 After / Loving care  
 After / Receiving information  
 After / Religious- and culture sensitive care  
 After/ Utilize external care  
 Before / No knowledge becuase of unfamiliarity  
 Before / Start of the palliative phase  
 Before / Medication and medical choices  
 Before / Palliative care services  
 Before / Person-centered care  
 Before / General discription of palliative care or it's  
 definition  
 After / Start of the palliative phase

Knowledge about palliative care

The importance of talking about  
the last phase of life

After / Medication and medical choices  
After / Palliation and loving care  
After / Palliative care services  
After / Person-centered care  
Talking with whom

Motivations or reasons to do/or not to do

Close family or friends  
With a care professional

Before / Expecting to be led through by a physician

Before / (grand)Children don't like to talk about the topic

Before / Having the time to talk about this subject

Before / The last phase of life is still far away

Before / Not wanting to burden close others with this subject

Before / Everyone has to experience it one day

Before / My mind is not on it

Before / Discussing only who decides about this subject

After / Too charged subject

After / Not appropriate to talk about this when the phase is there

After / Trusting choices or knowledge of (close) others

After / My mind is not on it

After / Trusting network for knowing where to go when the time is there

After / Still wanting to enjoy life

After / The last phase of life is still far away

After / Being prepared

After / (Trusting to being able to) talk openly about when the time is there

#### Codetree interviews educators

Educator's skills and struggles

Difficulties with probing or directing the discussion

New type of subject for the educators.

Notes: not just sending information, getting the group to talk about this subject, overcoming own inner hurdle to talk and think about this subject, breaking a culture or resistance towards it.

Aspects of the education itself

Multitude of preparations and actions

Degree of participation

Differences between participation of participants

Eliciting opinions and experiences of participants

Many participants participated

Asking critical questions and probing on opinions.

Notes: discussing pro's, con's consequences and why's

Educator gives examples (that embody situations)

Notes: from their medical or personal experience

|                                                     |                                                                                                                                                                                                                                                          |                                                                                                                                               |
|-----------------------------------------------------|----------------------------------------------------------------------------------------------------------------------------------------------------------------------------------------------------------------------------------------------------------|-----------------------------------------------------------------------------------------------------------------------------------------------|
|                                                     | <p>Responsiveness towards additional knowledge need of participants</p> <p>Giving space for several opinions</p> <p>Educator first let participants share general experiences about palliative care</p> <p>Showing own vulnerability of the educator</p> |                                                                                                                                               |
| Giving information about palliative care (services) | <p>Telling people how they could benefit from palliative care services</p> <p>Taking clear standpoints about what the doctor will do</p>                                                                                                                 |                                                                                                                                               |
| Noticed experience/responses of participants        | <p>Repetition of information needed</p> <p>Participants wanted to talk about it.</p> <p>Participants shared their experiences.</p> <p>Emotional subject for people who lost someone</p> <p>Confronting subject</p>                                       | Notes: some distanced themselves from the subject (using the belief in Allah to not talk about this subject) or said to trust their children. |
| Interactive methods                                 | <p>Videos had recognizable situation and conflicts of real-life situations</p> <p>Videos made the group calm and pause for thought</p> <p>Videos evoked group discussion</p> <p>Voting yes/no made it more light-hearted</p>                             |                                                                                                                                               |
